# Supplementary material
Source: PubMed Central journal article supplement (PMC4690491)
Supplement: supp_ddv447_ddv447supp.pdf [file supp_ddv447_ddv447supp.pdf]

**Supplementary Figure 1. Quantification of exocrine pancreas area and relative  $\beta$ -cell mass.** **A.** *insa*-mCherry expression in  $\beta$ -cells and *ptfla*-GFP expression in exocrine pancreas in 5dpf Tg(*ptfla*:GFP/*insa*:mCherry) larvae. **B.** Quantification of the area ( $\mu\text{m}^2$ ) of exocrine pancreas from 5 dpf larvae. **C.** Quantification of  $\beta$ -cell mass area relative to area of exocrine pancreas in control and *alms1*-, *bbs1*-, *bbs4*-depleted embryos. **D.** Quantification of  $\beta$ -cell number relative to area of exocrine pancreas in control and *alms1*-, *bbs1*-, *bbs4*-depleted embryos. \* indicates  $p=0.008$  and \*\* represents  $p\leq 0.0001$  relative to control after Bonferroni correction for multiple comparisons.  $n\geq 20$  per experiment.

**Supplementary Figure 2. Validation of morpholino sensitivity and specificity. (A-C)** Western blot analysis of 5 dpf zebrafish homogenates detecting the expression of Bbs1, Bbs4 or Alms1 proteins. Blot images are representative of two separate experiments per protein. **D.** qRT-PCR quantification of *alms1* transcript relative to *actin* in control and *alms1* morpholino injected embryos at 48 hpf and 5 dpf. **E.** Loss of wildtype *alms1* transcript (2446 bp) and presence of shortened morphant transcript (528 bp) in *alms1* morphants at 2 dpf, 5 dpf and 6 dpf. **F.** Expression of  $\Delta 113p^{53}$  transcript relative to *actin* in control, *alms1*, *bbs1* and *bbs4* depleted embryos. Data were represented as percent relative to control. **G.**  $\beta$ -cells in controls, *bbs1* morphants co-injected with *bbs1* mRNA, or *bbs4* morphants co-injected with *bbs4* mRNA. **H.** Quantification of  $\beta$ -cell count in control and rescued embryos. **(I-J)** Area and intensity of mCherry fluorescence in  $\beta$ -cells in 5 dpf F1 progeny of *alms1* or *bbs1* gRNA/Cas9-injected animals. Intensity represents fluorescence intensity per pixel as calculated by ImageJ. **(K-L)** T7-endonuclease

treatment of PCR-amplified target region in *alms1* (K) or *bbs1* (L) gRNA/Cas9-injected embryos (F0) or their progeny (F1). Gel images representative of assays repeated two times. Double bands indicate the presence of mismatch. The arrows indicate the wild type band (top) and the mismatched cleaved band (bottom). \* indicates  $p < 0.001$  and \*\* represents  $p \leq 0.0001$  relative to control after Bonferroni correction for multiple comparisons.

**Supplementary Figure 3. Effects of a second splice-blocking *bbs4* morpholino (*bbs4* MO2).** (A-B) Area and intensity of  $\beta$ -cell mass in control and *bbs4* CRISPR-targeted animals. C. Expression of *Al13p*<sup>53</sup> transcript relative to *actin* in control and embryos injected with *bbs4* MO2. Data represented as % relative to control. D. mCherry-expressing  $\beta$ -cells in control and *bbs4* MO2-injected animals at 48 hpf or 5 dpf. E. Average  $\beta$ -cell counts in control and *bbs4* MO2 animals at 48 hpf and 5 dpf. F. *ptfla*-GFP expression in exocrine pancreas in 5dpf Tg(*ptfla*:GFP/*insa*:mCherry) embryos. G. Quantification of the average area ( $\mu\text{m}^2$ ) of exocrine pancreas from 5 dpf embryos. H. Quantification of average  $\beta$ -cell number relative to area of exocrine pancreas in control and *bbs4*-depleted embryos. I. mCherry-expressing  $\beta$ -cells in 5 dpf controls and morphants grown in the absence and presence of glucose. J. Quantification of  $\beta$ -cell number at 48 hpf and 5 dpf under normal and high glucose conditions. Student t-test was performed on the data set. Error bars represent standard deviation. \* represents  $p = 0.0018$  and \*\* represents  $p \leq 0.0001$  relative to control after Bonferroni correction for multiple comparisons.  $n \geq 20$  per experimental group. Scale bars represent 100  $\mu\text{m}$ .

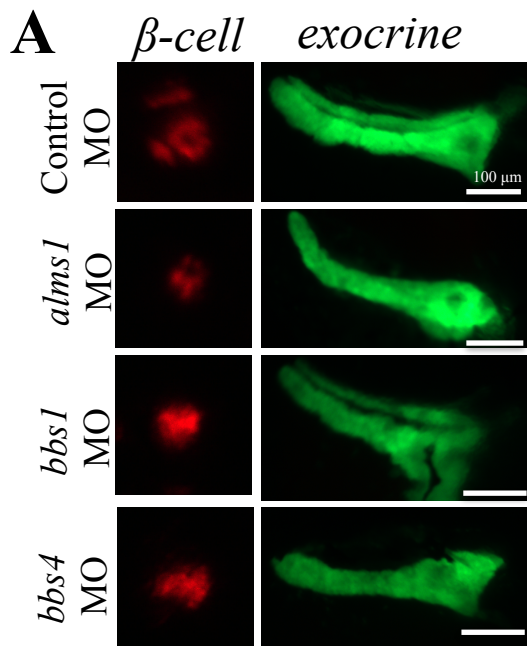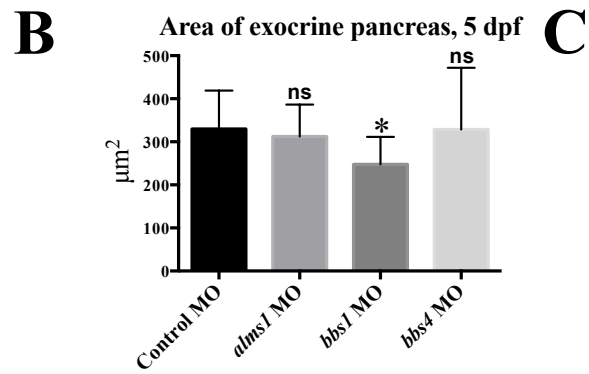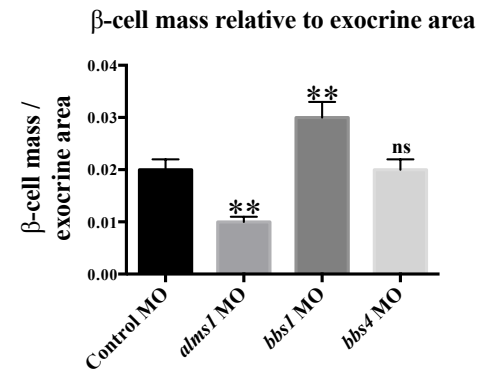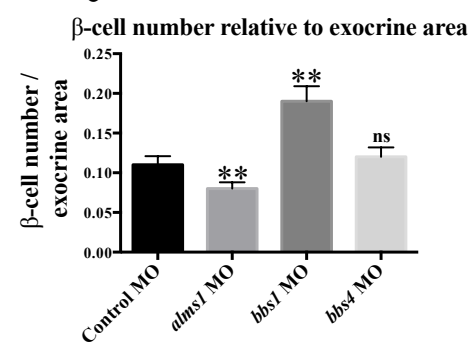

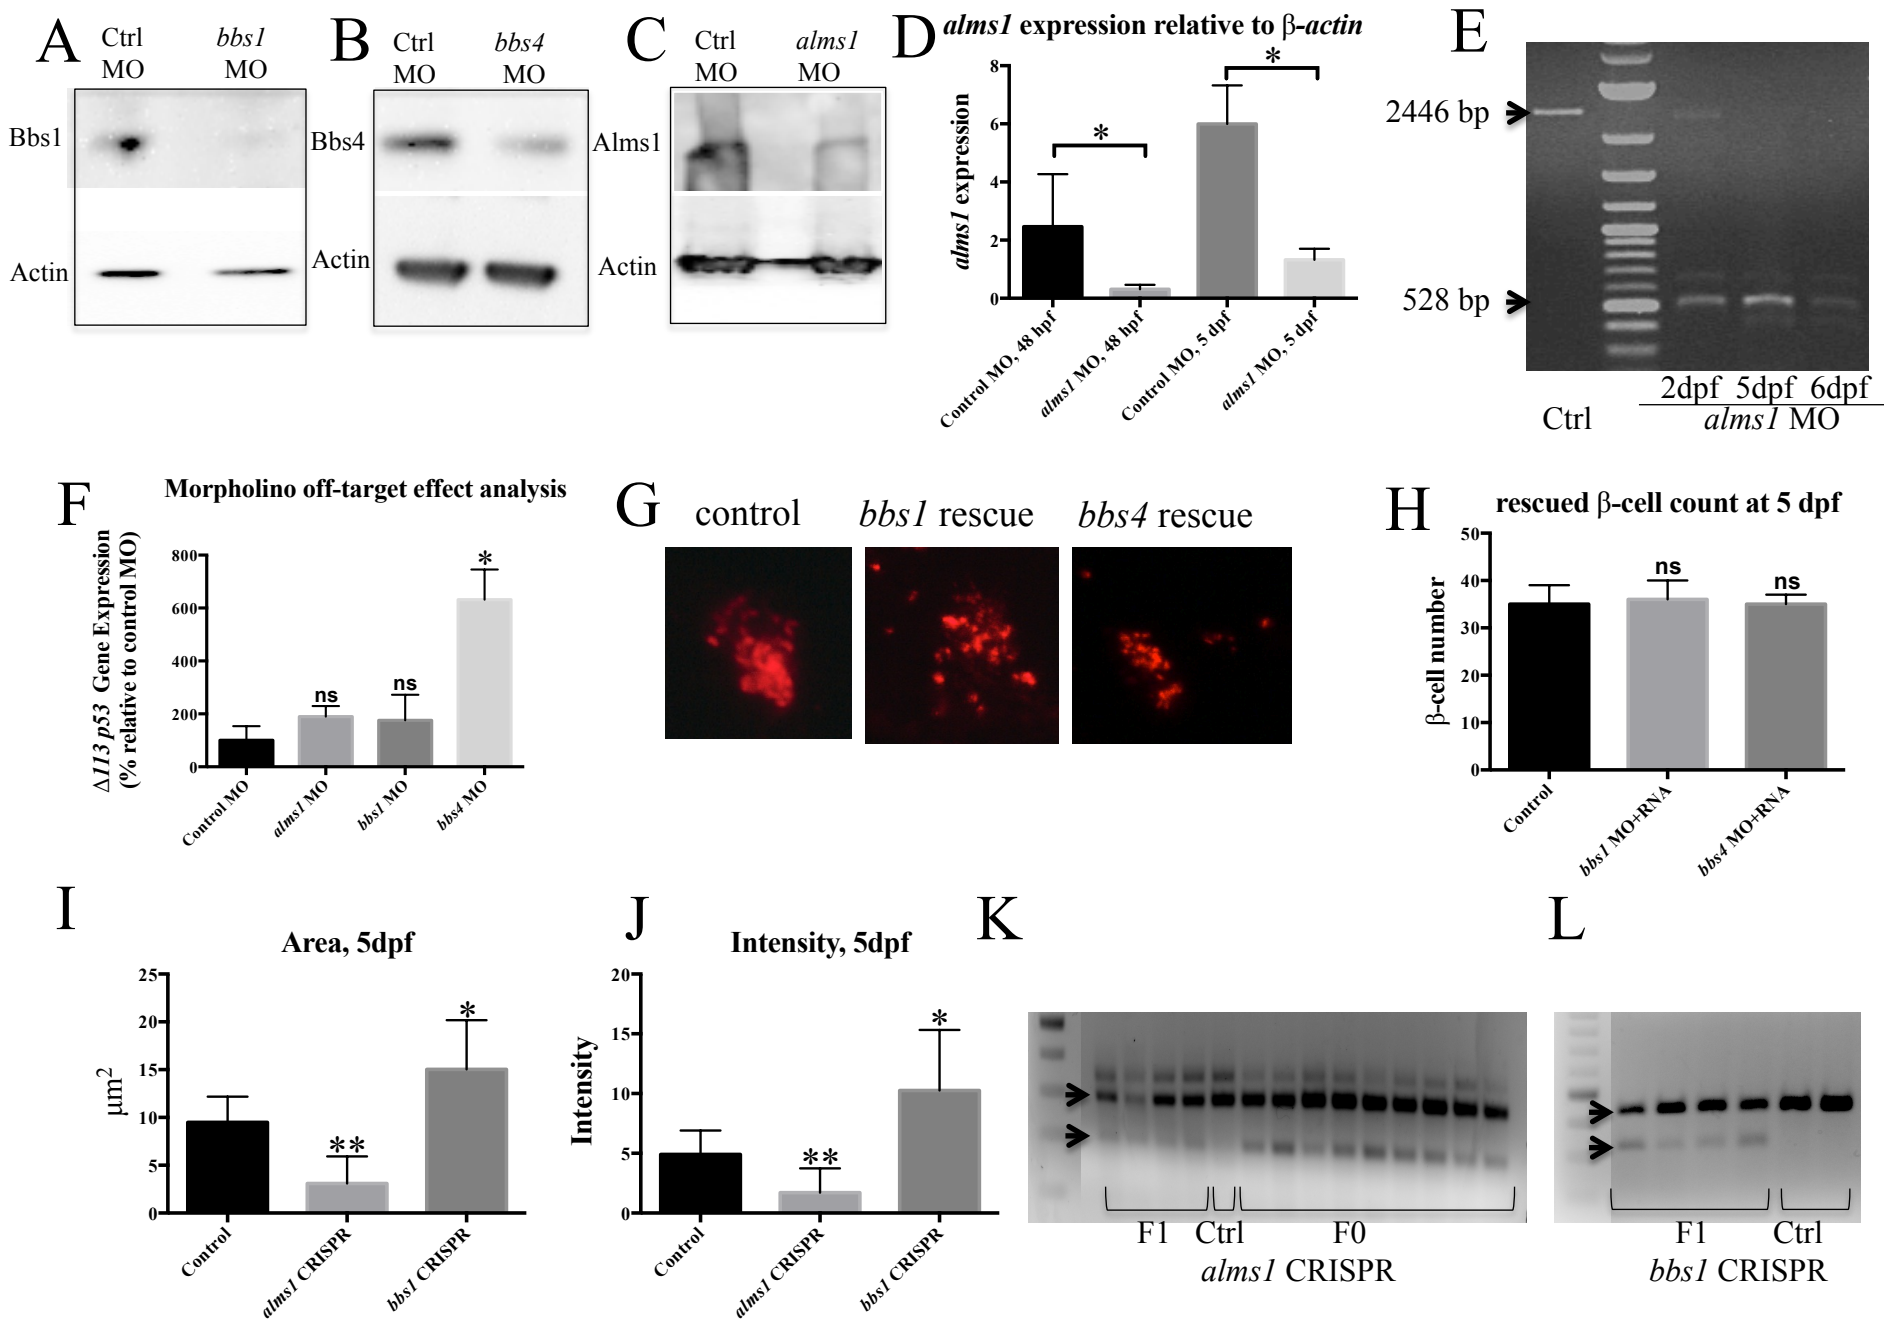

Figure S2

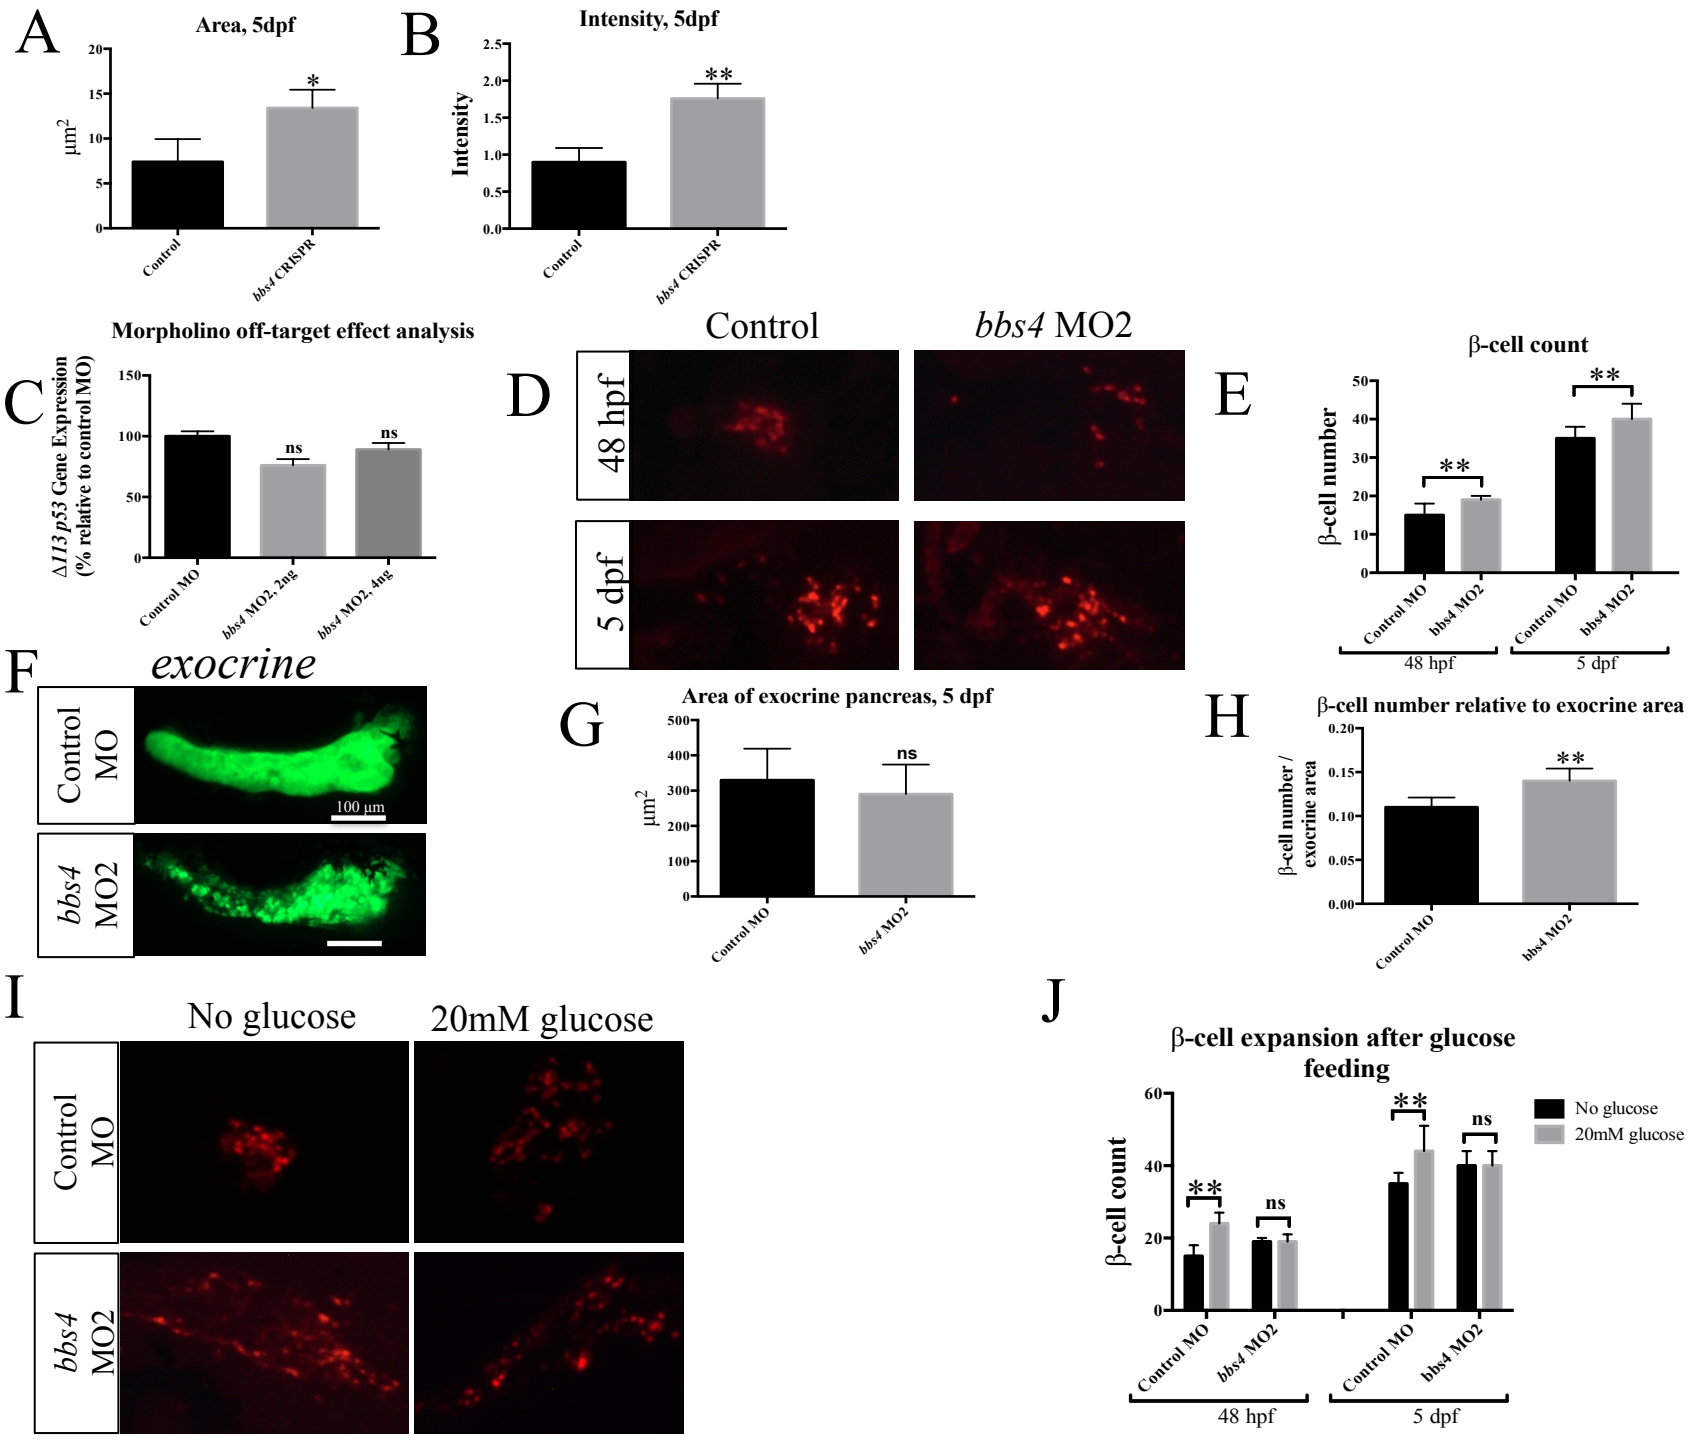

Figure S3
